# Supplementary material
Source: PubMed Central journal article supplement (PMC3304551)
Supplement: mmc1.pdf [file mmc1.pdf]

Biophysical Journal, Volume 96

**Supporting Material**

**An Integrated Model of Electrical Spiking, Bursting, and Calcium Oscillations in GnRH Neurons**

Patrick Fletcher and Yue-Xian Li

# A Model Description and Parameter Values

The following definitions for the functions and parameter values are the same in both the spatial and simplified models, except where indicated. Thus, in what follows,  $C$  and  $C_e$  should be interpreted as  $C(r, t)$  and  $C_e(r, t)$  for the spatial model. Table 1 gives the standard set of parameters values used in the present study. The calcium flux densities are given by:

$$j_{\text{in}} = -\alpha I_{\text{Ca}} = -\alpha(I_{\text{CaL}} + I_{\text{SOC}} + \gamma I_{\text{NSC}}) \quad (1)$$

$$j_{\text{out}} = \frac{\nu_p C^2}{C^2 + K_p^2} + \frac{\nu_n C^4}{C^4 + K_n^4} \quad (2)$$

$$j_{\text{ref}} = \frac{\nu_e C^2}{C^2 + K_e^2} \quad (3)$$

$$j_{\text{rel}} = (L + PO_I)(C_e - C). \quad (4)$$

Calcium entry at the plasma membrane is obtained by scaling the whole-cell current,  $I_{\text{Ca}}$  by  $\alpha = (2FA_{\text{cell}})^{-1}$  ( $4.12\text{e}^{-3} \mu\text{M} \mu\text{m} \text{ms}^{-1} \text{pA}^{-1}$ ) to yield the per unit area flux required by the boundary condition of the spatial model. The parameter  $\gamma$  (0.3) accounts for the fractional calcium conductance of the  $I_{\text{NSC}}$  channel as in LeBeau et al. (1). The  $\nu_x$  and  $K_x$ , where  $x=p, n$ , and  $e$  are the maximal pump rates, and the  $\text{Ca}^{2+}$  levels at which half-maximal activation is reached, respectively, for the PMCAs, NCXs, and SERCAs ( $\nu_e=1.3 \mu\text{M} \text{pL} \text{ms}^{-1}$ ; (in  $\mu\text{m} \mu\text{M} \text{ms}^{-1}$ ):  $\nu_n=0.13$  (0.4 in the simplified model),  $\nu_p=0.04$ ; (in  $\mu\text{M}$ ):  $K_e=0.2$ ,  $K_n=1$ ,  $K_p=0.1$ ).

The calcium release from stores is the sum of a leak and flux through the  $\text{IP}_3\text{R}$  channel, with flux rates  $L$  and  $P$  ( $0.0021$  and  $15 \text{pL} \text{ms}^{-1}$ , respectively). Following Li and Rinzel (2), the open probability of the  $\text{IP}_3\text{R}$  channel ( $O_I$ ) depends on cytosolic  $[\text{Ca}^{2+}]$  and the inactivation variable  $h_i$  and is parameterized by  $\text{IP}_3$  concentration ( $I$ ) as follows:

$$O_I = \left( \frac{I}{I + K_i} \right)^3 \left( \frac{C}{C + K_{\text{ca}}} \right)^3 h_i^3. \quad (5)$$

where  $K_i=0.1 \mu\text{M}$  and  $K_{\text{ca}}=0.4 \mu\text{M}$ . The rate of change of the variable  $h_i$  at a given radius depends on the local cytosolic  $[\text{Ca}^{2+}]$  at that radius as follows:

$$\tau_{\text{hi}} \frac{dh_i}{dt} = (K_d - (C + K_d)h_i), \quad (6)$$

where  $K_d=0.4 \mu\text{M}$  and  $\tau_{hi}$ , the time constant of  $\text{IP}_3\text{R}$  channel inactivation, is  $2 \mu\text{M ms}$  for the biphasic response. Qualitatively similar results can be obtained by replacing  $h_i$  by its quasi-steady state value  $K_d/(C + K_d)$ , thus reducing the number of variables by one.

The voltage gated ionic currents are given by:

$$I_{\text{Na}} = g_{\text{Na}} m_{\infty}^3 h (V - E_{\text{Na}}) \quad (7)$$

$$I_{\text{CaL}} = g_{\text{CaL}} a^2 (V - E_{\text{Ca}}) \quad (8)$$

$$I_{\text{K}} = g_{\text{K}} n^4 (V - E_{\text{K}}) \quad (9)$$

$$I_{\text{ir}} = g_{\text{ir}} b_{\infty} (V - E_{\text{K}}) \quad (10)$$

where the activation variable  $m$  for  $I_{\text{Na}}$  is assumed to be fast and takes its equilibrium value,  $m_{\infty}$ . The whole cell conductances are (in nS):  $g_{\text{Na}}=11$ ,  $g_{\text{CaL}}=1.2$ ,  $g_{\text{K}}=25$ , and  $g_{\text{ir}}=1$ . The three gating variables  $q \equiv h, a$ , and  $n$  are governed by

$$\tau_q \frac{dq}{dt} = q_{\infty} - q. \quad (11)$$

The  $q_{\infty}(V)$  have the form  $q_{\infty} = q_{\text{max}}/(1 + \exp((V_m - V_q)/k_q)) + q_{\text{min}}$ , with  $s = -1$  for  $m_{\infty}, a_{\infty}$  and  $n_{\infty}$ ,  $s = 1$  for  $h_{\infty}$  and  $b_{\infty}$ , and  $q_{\text{max}}$  and  $q_{\text{min}}$  are 1 and 0 respectively for all gating variables except  $b$ , which takes the values 0.8 and 0.2 respectively. Except for Fig. 8, the parameter values for the  $q_{\infty}(V)$  are identical for the generation of all results presented (in mV):  $V_m=-43$ ,  $V_h=-55$ ,  $V_a=-29$ ,  $V_n=-27$ ,  $V_b=-80$ ,  $k_m=6$ ,  $k_h=6$ ,  $k_a=10$ ,  $k_n=15$ , and  $k_b=12$ .

The  $\tau_q(V)$  have the form  $\tau_q = \bar{\tau}_q / (\exp((V_m - V_q)/k_{\tau_q}) + z \exp(-z(V_m - V_q)/k_{\tau_q}))$ , with  $z = 2$  for  $\tau_h$ , and  $z = 1$  for  $\tau_a$ , and  $\tau_n$ . The parameter values for the  $\tau_q(V)$  are identical for generation of all results presented (in ms):  $\bar{\tau}_h=150$ ,  $\bar{\tau}_a=10$ , and  $\bar{\tau}_n=40$ ; (in mV):  $V_{\tau_h}=-65$ ,  $V_{\tau_a}=-29$ ,  $V_{\tau_n}=-33$ ,  $k_{\tau_h}=15$ ,  $k_{\tau_a}=25$ , and  $k_{\tau_n}=23$ .

We use a Hill function to parameterize the activation of the NSC current by cAMP:

$$I_{\text{NSC}} = g_{\text{NSC}} \frac{A^2}{K_{\text{NSC}}^2 + A^2} (V_m - E_{\text{NSC}}) \quad (12)$$

where  $g_{\text{NSC}}=0.3 \text{ nS}$  is the whole cell conductance,  $A$  is the cytosolic cAMP concentration in  $\mu\text{M}$ ,  $K_{\text{NSC}}=2 \mu\text{M}$  is the cAMP concentration at which  $I_{\text{NSC}}$  is half maximally activated, and  $E_{\text{NSC}}=72 \text{ mV}$  is the Nernst potential based on the fractional conductance of  $\text{Ca}^{2+}$  and  $\text{Na}^+$ , given as  $E_{\text{NSC}} = E_{\text{Na}} + \gamma(E_{\text{Ca}} - E_{\text{Na}})$ . We assume that  $I_{\text{NSC}}$  is activated is a Hill function of

cAMP to model effect of adenylyl cyclase activity on PM excitability, although here cAMP is a parameter and the activation due to cAMP is constant. A few candidates for the effector of the adenylyl cyclase pathway on membrane excitability exist, including CNG channels and HCN channels (3, 4), the cAMP activated  $\text{Cl}^-$  channel CFTR (5), or the phosphorylation of other ion channels by PKA (6, 7). The hill coefficient of 2 is not critical for any of the model behavior present, but is inspired from the cAMP dependence of CNG channels (8).

The calcium-activated potassium current is given by

$$I_{\text{SK}} = g_{\text{SK}} \frac{C_{\text{R}}^8}{C_{\text{R}}^8 + K_{\text{SK}}^8} (V - E_{\text{K}}), \quad (13)$$

where  $C_{\text{R}}$  is the  $[\text{Ca}^{2+}]_{\text{i}}$  at the cell membrane, given by either  $C(R)$  in the spatial model or its approximation  $C_{\text{R}}$  in the simplified model.  $g_{\text{SK}}=1.5$  nS is the whole cell conductance, and  $K_{\text{SK}}=1$   $\mu\text{M}$  is the  $[\text{Ca}^{2+}]_{\text{i}}$  at which  $I_{\text{SK}}$  is half maximally activated.

The store operated current is inhibited by high ER calcium, and is given by

$$I_{\text{SOC}} = g_{\text{SOC}} \frac{K_{\text{SOC}}^4}{K_{\text{SOC}}^4 + C_{\text{eR}}^4} (V_{\text{m}} - E_{\text{Ca}}) \quad (14)$$

where  $C_{\text{eR}}$  is the  $[\text{Ca}^{2+}]_{\text{ER}}$  near the cell membrane in the spatial model, or just the whole cell value of  $[\text{Ca}^{2+}]_{\text{ER}}$  in the simplified model.  $g_{\text{SOC}}=0.03$  nS is the whole cell conductance, and  $K_{\text{SOC}}=100$   $\mu\text{M}$  is the  $[\text{Ca}^{2+}]_{\text{ER}}$  at which  $I_{\text{SOC}}$  is half maximally activated, and the Hill coefficient comes from Luik et al. (9).

*Numerical Methods.* By assuming spherical symmetry, we are able to use the transformations of variables  $U = rC$  and  $W = rC_e$  to rewrite the PDE system with just one spatial dimension, the radius from the center of the cell. This system is then discretized in space with a second order central difference approximation and integrated using the ode15s routine as implemented in MATLAB<sup>®</sup> (2007b, The MathWorks, Natick, MA). We used 50 spatial grid points to produce the results below; there was no qualitative changes when the number of grid points was reduced to 25. Code for both the spatial and simplified model in MatLab are available upon request. Code for the simplified model is also available for XPP.

| Parameter                                                               | Symbol                                       | Value                     |
|-------------------------------------------------------------------------|----------------------------------------------|---------------------------|
| basal [cAMP]                                                            | $A$                                          | $0.7 \mu\text{M}$         |
| basal [IP <sub>3</sub> ]                                                | $I$                                          | $0.01 \mu\text{M}$        |
| Cell Radius                                                             | $R$                                          | $10 \mu\text{m}$          |
| Cell Area                                                               | $A_{\text{cell}} (4\pi R^2)$                 | $1257 \mu\text{m}^2$      |
| Cell Volume                                                             | $V_{\text{cell}} (4/3\pi R^3 \cdot 1e^{-3})$ | $4.19 \text{ pL}$         |
| Cytoplasmic Volume                                                      | $V_{\text{cyt}} (0.85 V_{\text{cell}})$      | $3.56 \text{ pL}$         |
| ER Volume                                                               | $V_{\text{ER}} (0.15 V_{\text{cell}})$       | $0.63 \text{ pL}$         |
| Surface Area to Volume Ratio                                            | $\beta (A_{\text{cell}}/V_{\text{cyt}})$     | $0.35 \mu\text{m}^{-1}$   |
| Membrane Capacitance                                                    | $C_{\text{m}}$                               | $14 \text{ pF}$           |
| K <sup>+</sup> , Na <sup>+</sup> , Ca <sup>2+</sup> Reversal Potentials | $E_{\text{K}}, E_{\text{Na}}, E_{\text{Ca}}$ | $-80, 60, 100 \text{ mV}$ |

Table 1: Table of some standard parameter values used in the model.

## References

1. LeBeau, A. P., F. Van Goor, S. S. Stojilkovic, and A. Sherman, 2000. Modeling of membrane excitability in gonadotropin-releasing hormone-secreting hypothalamic neurons regulated by Ca<sup>2+</sup>-mobilizing and adenylyl cyclase-coupled receptors. *J Neurosci* 20:9290–7.
2. Li, Y. X., and J. Rinzel, 1994. Equations for InsP<sub>3</sub> receptor-mediated [Ca<sup>2+</sup>]<sub>i</sub> oscillations derived from a detailed kinetic model: a Hodgkin-Huxley like formalism. *J Theor Biol* 166:461–73.
3. Vitalis, E. A., J. L. Costantin, P. S. Tsai, H. Sakakibara, S. Paruthiyil, T. Iiri, J. F. Martini, M. Taga, A. L. Choi, A. C. Charles, and R. I. Weiner, 2000. Role of the cAMP signaling pathway in the regulation of gonadotropin-releasing hormone secretion in GT1 cells. *Proc Natl Acad Sci U S A* 97:1861–6.
4. Arroyo, A., B. Kim, R. L. Rasmusson, G. Bett, and J. Yeh, 2006. Hyperpolarization-activated cation channels are expressed in rat hypothalamic gonadotropin-releasing hormone (GnRH) neurons and immortalized GnRH neurons. *J Soc Gynecol Investig* 13:442–50.
5. Weyler, R. T., K. A. Yurko-Mauro, R. Rubenstein, W. J. Kollen, W. Reenstra, S. M. Altschuler, M. Egan, and A. E. Mulberg, 1999. CFTR is functionally active in GnRH-expressing GT1-7 hypothalamic neurons. *Am J Physiol* 277:C563–71.
6. Constantin, S., and S. Wray, 2008. Gonadotropin-releasing hormone-1 neuronal activity is independent of cyclic nucleotide-gated channels. *Endocrinology* 149:279–90.
7. Constantin, S., and S. Wray, 2008. Gonadotropin-Releasing Hormone-1 Neuronal Activity Is Independent of Hyperpolarization-Activated Cyclic Nucleotide-Modulated Channels but Is Sensitive to Protein Kinase A-Dependent Phosphorylation. *Endocrinology* 149:3500–3511.
8. Nakamura, T., and G. H. Gold, 1987. A cyclic nucleotide-gated conductance in olfactory receptor cilia. *Nature* 325:442–4.
9. Luik, R. M., B. Wang, M. Prakriya, M. M. Wu, and R. S. Lewis, 2008. Oligomerization of STIM1 couples ER calcium depletion to CRAC channel activation. *Nature* 454:538–542.
